# Supplementary material for: Dip coating of shear-thinning particulate suspensions
Source: Royal Society of Chemistry journal article supplement (doi:10.1039/d4sm00941j), 2024-01-01
Supplement: d4sm00941j1.xlsx [file d4sm00941j1.xlsx]

## Sheet: figure 3-4
XG25(70/30)							XG500(70/30)							XG3000(70/30)
	H0_MEAN [m]	H_STD [m]	h(calculated)withoutA	CA_with_matching_A				H0_MEAN [m]	H_STD [m]	h(calculated)withoutA	CA_with_matching_A				H0_MEAN [m]	H_STD [m]	h(calculated)withoutA	CA_with_matching_A
	7.93293e-05	1.20686e-06	4.83317e-05	0.00556467				0.000115844	4.7349e-07	8.89706e-05	0.0164666				0.000316081	1.51035e-05	0.000189854	0.0506801
	5.65681e-05	1.73927e-06	3.10234e-05	0.00286171				9.35789e-05	2.13071e-06	6.10278e-05	0.00935461				0.000236661	1.06742e-05	0.00014415	0.0335298
	3.99436e-05	2.22869e-06	1.98833e-05	0.00146833				7.26533e-05	2.36745e-06	4.1807e-05	0.00530405				0.000168443	5.41249e-06	0.000109346	0.022152
	3.22449e-05	2.01761e-06	1.52172e-05	0.000983089				6.16047e-05	1.89396e-06	2.84506e-05	0.00297764				0.000140136	3.38169e-06	9.26085e-05	0.0172657
	2.82283e-05	1.07598e-06	1.26445e-05	0.000744634				5.57455e-05	4.02467e-06	2.27876e-05	0.00213443				0.000128633	7.80969e-06	8.25444e-05	0.0145291
	2.22033e-05	1.07598e-06	9.7395e-06	0.00050338				4.70405e-05	8.75957e-06	1.94673e-05	0.00168536				0.00011763	3.24583e-06	7.01888e-05	0.0113922
	1.94139e-05	6.69445e-07	8.09289e-06	0.000381282											0.000104427	3.16151e-06	6.25611e-05	0.00958659
							XG1000(70/30)	H0_MEAN [m]	H_STD [m]	h(calculated)withoutA	CA_with_matching_A
XG50(70/30)	H0_MEAN [m]	H_STD [m]	h(calculated)withoutA	CA_with_matching_A				0.000151996	2.1121e-06	0.000115749	0.0251869			XG250(60/40)	H0_MEAN [m]	H_STD [m]	h(calculated)withoutA	CA_with_matching_A
	8.09326e-05	6.97136e-07	5.00936e-05	0.00610212				0.000122429	1.80936e-06	8.22284e-05	0.0150811				3.51059e-05	7.48246e-07	2.07966e-05	0.00164079
	6.00576e-05	3.86702e-07	3.22755e-05	0.00315586				0.000103046	1.65352e-06	5.83471e-05	0.00901423				2.48017e-05	6.65703e-06	1.41781e-05	0.000923612
	4.55455e-05	3.34893e-07	2.0764e-05	0.00162845				8.59633e-05	1.80936e-06	4.74721e-05	0.00661542				1.5576e-05	1.97967e-06	9.65323e-06	0.000518888
	3.80662e-05	3.11169e-06	1.59274e-05	0.00109402				7.96118e-05	3.91938e-06	4.11534e-05	0.0053396				1.16221e-05	1.09812e-06	6.52835e-06	0.000288583
	3.11451e-05	3.19468e-06	1.32554e-05	0.000830612				7.01942e-05	2.96278e-06	3.36493e-05	0.00394788
	2.54519e-05	1.86461e-06	1.02327e-05	0.000563371				6.29667e-05	1.80936e-06	2.91705e-05	0.00318651
	2.25495e-05	2.15306e-06	8.51609e-06	0.000427729										XG2000(85/15)	H0_MEAN [m]	H_STD [m]	h(calculated)withoutA	CA_with_matching_A
															0.00119872	1.80543e-05	0.000688769	0.402988
XG100(70/30)	H0_MEAN [m]	H_STD [m]	h(calculated)withoutA	CA_with_matching_A			XG2000(70/30)	H0_MEAN [m]	H_STD [m]	h(calculated)withoutA	CA_with_matching_A				0.000807832	1.2638e-05	0.000554723	0.29127
	8.50629e-05	8.86045e-07	5.28528e-05	0.00680379				0.000247768	1.65674e-06	0.000141717	0.0342343				0.000471148	1.80543e-06	0.000411879	0.186353
	7.31184e-05	6.97136e-07	4.09135e-05	0.00463392				0.000187605	2.17612e-06	0.000104832	0.0217807				0.000281021	5.95244e-06	0.000305507	0.119046
	6.36298e-05	3.34893e-06	3.43359e-05	0.00356263				0.000137771	7.48408e-06	7.74678e-05	0.013836				0.000232864	2.83745e-06	0.00025528	0.0909298
	5.22434e-05	1.77209e-06	2.65049e-05	0.00241623				0.000110999	4.66983e-06	6.4586e-05	0.0105326				0.00020545	6.0878e-06	0.000225424	0.0754539
	4.8113e-05	1.17611e-06	2.22735e-05	0.00186136				9.71618e-05	5.7391e-06	5.69435e-05	0.00871955				0.00015156	8.16245e-06	0.000167052	0.0481347
	4.19733e-05	3.61209e-06	1.71706e-05	0.00125987				9.10453e-05	3.51232e-06	4.76824e-05	0.00668136
	3.54987e-05	1.77209e-06	1.43395e-05	0.000961502				7.48015e-05	4.08409e-06	4.20402e-05	0.00553126
	3.37126e-05	3.96723e-06	1.25109e-05	0.000783576
	3.24847e-05	4.06037e-06	1.11236e-05	0.000656926
	2.73496e-05	2.27957e-06	9.28954e-06	0.000501349
average capillary length [m]
0.00162521

## Sheet: figure 7
Particles	PB1	PB2	PB1		PB2		PB1	PB2	PB0(0.5%)	PB0(0.5%)	PB0(0.5%)	PB0(0.76%)	PB0(0.76%)	PB0(0.76%)		PB0(2%)	PB3	PB3	PB3		PB1
LIQUID	XG1000(1)	XG1000(2)	XG2000		XG2000		XG3000	XG3000(1)	XG2000(85/15)	XG2500(85/15)	XG3000(85/15)	XG2000(85/15)	XG2500(85/15)	XG3000(85/15)		XG2000(85/15)	XG1000	XG1500	XG2000		XG3000(2)
surface tension [N/m]	0.03242	0.0301	0.0313	0.0313	0.0313	0.0313	0.03815	0.03602	0.0385	0.0372	0.0326	0.0385	0.0372	0.0326	0.02996	0.02996	0.0301	0.03663	0.0313	0.0313	0.03655
density [kg/m^3]	1183.2	1181.9	1199.1	1199.1	1199.1	1199.1	1231.5	1223	1255	1259	1231.5	1255	1259	1261	1259	1259	1181.9	1221.4	1199.1	1199.1	1231.5
capillary length [m]	0.00167211	0.00161205	0.00163204	0.00163204	0.00163204	0.00163204	0.00177794	0.00173359	0.00176928	0.00173638	0.00164353	0.00176928	0.00173638	0.0016242	0.00155828	0.00155828	0.00161205	0.00174935	0.00163204	0.00163204	0.00174026
Bo	0.0521457	0.0132154	0.0547374	0.0547374	0.0128937	0.0128937	0.0461225	0.0114274	0.099244	0.10304	0.115011	0.099244	0.10304	0.117766	0.12794	0.12794	0.00846114	0.00718515	0.00825516	0.00825516	0.0481415
K [Pa s^n]	0.5986	0.3463	1.025	1.025	1.025	1.025	1.609	1.556	3.875	4.275	5.324	3.875	4.275	5.324	4.264	4.264	0.3463	1.528	1.025	1.025	1.556
n	0.5832	0.6306	0.42	0.42	0.42	0.42	0.4208	0.401	0.39	0.3765	0.3016	0.39	0.3765	0.3016	0.3842	0.3842	0.6306	0.4042	0.42	0.42	0.3865
Boundary velocity [m/s]	0.00519882	0.00112837	0.0066	0.00632	0.00081626	0.0009177	0.00208908	0.00056615	0.005819	0.00519882	0.004164	0.002435	0.00292	0.00292	0.00112	0.00122	0.000735	0.00040954	0.000491	0.00053	0.0024353
A_new	1.67	1.67	1.67	1.67	1.67	1.67	1.67	1.67	1.67	1.67	1.67	1.67	1.67	1.67	1.67	1.67	1.67	1.67	1.67	1.67	1.67
h0_from_A_exp	0.000207407	6.48618e-05	0.000213681	0.000209494	8.2295e-05	8.68156e-05	0.000191802	9.91038e-05	0.00071626	0.000738503	0.000754783	0.000488964	0.000576422	0.000645971	0.000410486	0.000426027	5.10687e-05	8.44156e-05	6.52526e-05	6.75697e-05	0.000178642
CA_from_A_exp	0.0250664	0.00451971	0.0295564	0.0286919	0.00706422	0.00765422	0.0220967	0.00861092	0.16319	0.176949	0.206317	0.0920459	0.12202	0.166277	0.085912	0.0908369	0.00315761	0.00666714	0.0049877	0.00525571	0.0208745

## Sheet: figure 8
XG1500	v(m/s)	Ca	Phi_s(small)	Phi_s(small)_std	Phi_s(big)	Phi_s(big)_std
	0.01199	0.0675828	0.00176788	0.000398386	0.00292993	0.00146496
	0.0076466	0.0477182	0.00117858	6.37927e-05	0.00317409	0.0023546
	0.007266	0.0458699	0.00176788	0.000398386	0.00317409	0.00184337
	0.0036457	0.0269016	0.00106809	0.000230008	0.000488321	0.000422898
	0.001829	0.0157757	0.000736615	6.37927e-05
	0.000918	0.00925446	0.000331477	0.000191378
	0.000613	0.00677095	0.000184154	6.37927e-05
	0.0004605	0.00542658	0.000110492	0
	0.0004095	0.00495546	7.36615e-05	6.37927e-05
XG2000	v(m/s)	Ca	Phi_s(small)	Phi_s(small)_std	Phi_s(big)	Phi_s(big)_std
	0.01199	0.0364421	0.00209935	0.00015626	0.00366241	0
	0.007266	0.0241071	0.0021546	0.000703169	0.0018312	0.00258971
	0.0036457	0.0136472	0.00127066	0.000703169
	0.001829	0.00772503	0.000552461	0.000312519
	0.001048	0.00487945	0.000110492	0.00015626
XG1000	v(m/s)	Ca	Phi_s(small)	Phi_s(small)_std	Phi_s(big)	Phi_s(big)_std
	0.01199	0.0314733	0.000939184	0.000390649	0.00329617	0.00155383
	0.008069	0.0228584	0.000441969	0.000468779	0.00109872	0.000517943
	0.007266	0.021003	0.000552461	0.000312519
	0.0036457	0.012034	0.000165738	7.81298e-05
	0.001829	0.00689442	0.000276231	7.81298e-05
	0.001048	0.00439735	5.52461e-05	7.81298e-05

## Sheet: figure 9
PB2+PB1
PB2											PB1
LIQUID			XG1000		XG3000		XG1500				LIQUID	XG1000		XG3000		XG1500
surface tension [N/m]			0.0301		0.03655		0.03663				surface tension [N/m]	0.0301		0.03655		0.03663
density [kg/m^3]			1181.9		1231.5		1221.4				density [kg/m^3]	1181.9		1231.5		1221.4
capillary length [m]			0.00161205		0.00174026		0.00174935				capillary length [m]	0.00161205		0.00174026		0.00174935
Bo			0.0132154		0.01134		0.0112224	0.0119259			Bo	0.0561031		0.0481415		0.0476424	0.050629
K [Pa s^n]			0.3463		1.556		1.528				K [Pa s^n]	0.3463		1.556		1.528
n			0.6306		0.3865		0.4042				n	0.6306		0.3865		0.4042
A			1.67		1.67		1.67				A	1.67		1.67		1.67
h0 [m]			0.000110231		0.00011686		0.000101094				h0 [m]	0.000146289		0.000227963		0.00018746
Boundary velocity [m/s]			0.00292		0.00092		0.000613				Boundary velocity [m/s]	0.00485		0.00426		0.00244
Ca			0.0100134		0.0110443		0.00873763				Ca	0.0153089		0.0300912		0.0220632
PB3+PB1
PB3											PB1
LIQUID			XG1000		XG1500		XG2000				LIQUID	XG1000		XG1500		XG2000
surface tension [N/m]			0.03318		0.02996		0.03308				surface tension [N/m]	0.03318		0.02996		0.03308
density [kg/m^3]			1173.2		1182.4		1170.2				density [kg/m^3]	1173.2		1182.4		1170.2
capillary length [m]			0.00169879		0.00160796		0.0016984				capillary length [m]	0.00169879		0.00160796		0.0016984
Bo			0.00762086		0.00850611		0.00762271				Bo	0.0505206		0.0563892		0.0505438
K [Pa s^n]			0.4408		0.8476		0.4377				K [Pa s^n]	0.4408		0.8476		0.4377
n			0.5831		0.5327		0.61112				n	0.5831		0.5327		0.61112
A			1.67		1.67		1.67				A	1.67		1.67		1.67
h0 [m]			6.60313e-05		6.65269e-05		7.14381e-05				h0 [m]	0.000198146		0.000301183		0.000207227
Boundary velocity [m/s]			0.001048		0.0004095		0.001048				Boundary velocity [m/s]	0.008069		0.00765		0.007266
Ca			0.00439735		0.00495546		0.00487945				Ca	0.0228584		0.0477346		0.0241071
